# Supplementary material
Source: publisher site journal article supplement (https://www.dovepress.com/article/210502)
Supplement: Supplementary file 1 [file get_supplementary_file.php]

**Supplementary Table S1**. Dependency-2-A (D-2-A) and Dependency-2-B (D-2-B) criteria used in the current study

Where applicable to the following questions, please mark ◯.

| Dependency-2-A (D-2-A) | | | | | | |
| --- | --- | --- | --- | --- | --- | --- |
| Questions | | Remarkable | Moderate | Slight | None | Remarks (reason) |
| 1 | Do you feel clear headed on this drug? |  |  |  |  |  |
| 2 | Do you feel indifferent to/disliked any person or thing on this drug? |  |  |  |  |  |
| 3 | Do you become hyperactive or talkative on this drug? |  |  |  |  |  |
| 4 | Do you become broad-minded on this drug? |  |  |  |  |  |
| 5 | Do you feel intoxicated on this drug? |  |  |  |  |  |
| 6 | Do you feel irritable or somewhat lonely when the drug effect runs out? |  |  |  |  |  |
| 7 | Do you want to continue taking this drug? |  |  |  |  |  |
| 8 | Do you think this drug became less effective? |  |  |  |  |  |
| 9 | Do you want to take this drug in larger doses? |  |  |  |  |  |
| 10 | Do you feel nauseated or tremulous when the drug effect runs out? |  |  |  |  |  |

| Dependency-2-B (D-2-B) | | | | | | |
| --- | --- | --- | --- | --- | --- | --- |
| Questions | | Remarkable | Moderate | Slight | None | Remark (reason) |
| 1 | Have you felt irritable or unstable after you were off this drug? |  |  |  |  |  |
| 2 | Have you had more difficulty in sleeping after you were off this drug? |  |  |  |  |  |
| 3 | Have you had nausea, vomiting, tremors of limb or perspiration after you were off this drug? |  |  |  |  |  |
| 4 | Do you really want to take this drug again? |  |  |  |  |  |
| 5 | Have you had convulsions after you were off this drug? |  |  |  |  |  |
| 6 | Have you had clouded mind or heard or seen anything unusual after you were off this drug? |  |  |  |  |  |

**Note:** Patients meeting at least one of the following criteria were reported to the Data and Safety Monitoring Board as suspected cases of drug dependence:

1. Answered ≥1 of any question (except no. 7) as “remarkable” OR answered question 6 as “moderate” in the Dependency-2-A (D-2-A) questionnaire.

2. Answered ≥1 of any question (except no. 4) as “remarkable” OR answered question 1 or 3 as “moderate” in the Dependency-2-B (D-2-B) questionnaire.

If question 7 in the D-2-A questionnaire or question 4 in the D-2-B questionnaire was answered as “remarkable,” the decision to report the case to the Data and Safety Monitoring Board as a suspected case of drug dependence was based on the investigator’s discretion because the answer could be associated with the analgesic effect.

**Supplementary Table S2.** List of approving local ethics committees (institutional review boards)

| Asahikawa Medical University Hospital Institutional Review Board |
| --- |
| Chiba University Hospital Institutional Review Board |
| Social Welfare Organization Saiseikai, Imperial Gift Foundation Inc. Chibaken Saiseikai Narashino Hospital Institutional Review Board |
| Chubu Rosai Hospital Institutional Review Board |
| Eniwa Hospital Institutional Review Board |
| Fukushima Medical University Hospital Institutional Review Board |
| Hakodate Central General Hospital Institutional Review Board |
| Hiroshima City Asa Citizens Hospital Institutional Review Board |
| Hiroshima Clinic Institutional Review Board |
| Hiroshima Red Cross Hospital & Atomic-bomb Survivors Hospital Institutional Review Board |
| Juntendo University Hospital Institutional Review Board |
| Junwakai Memorial Hospital Institutional Review Board |
| Keio University Hospital Institutional Review Board |
| The Institutional Review Board of Kitasato University Shirokane Campus |
| Kobe University Hospital Institutional Review Board |
| Kondo Memorial Medical Foundation Tomisaka Clinic Institutional Review Board |
| Kurume University Hospital Institutional Review Board |
| Kyorin University Hospital Institutional Review Board |
| Marunouchi Hospital Institutional Review Board |
| Mie University Hospital Institutional Review Board |
| Nagasaki Rosai Hospital Institutional Review Board |
| National Hospital Organization Chiba Medical Center Institutional Review Board |
| Nihonbashi Sakura Clinic Institutional Review Board |
| Niigata University Medical & Dental Hospital Institutional Review Board |
| Nippon Life Hospital Institutional Review Board |
| NTT Medical Center Tokyo Institutional Review Board |
| Ogikubo Hospital Institutional Review Board |
| Oita Central Institutional Review Board |
| Oita University Hospital Institutional Review Board |
| Onishi Medical Clinic Institutional Review Board |
| Saga Medical Centre Koseikan Institutional Review Board |
| Saga University Hospital Institutional Review Board |
| Sendai Institutional Review Board |
| Shimane University Hospital Institutional Review Board |
| Shinagawa Clinic Institutional Review Board |
| Shin-Kokura Hospital Institutional Review Board |
| Shinshu University Hospital Institutional Review Board |
| Teikyo University Chiba Medical Center Institutional Review Board |
| The University of Tokyo Hospital Institutional Review Board |
| Tokushukai Group Institutional Review Board |
| Toyama University Hospital Drug Acceptance Research Review Board |
| Tsuchiura Kyodo General Hospital Institutional Review Board |
| Tsukuba Gakuen Hospital Institutional Review Board |
| University of Fukui Hospital Institutional Review Board |
| Yasuda hospital Institutional Review Board |
